# Supplementary material for: Variations in Growth and Photosynthetic Traits of Polyploid Poplar Hybrids and Clones in Northeast China
Source: MDPI journal article supplement (doi:10.3390/genes13112161), 2022-11-19
Supplement: s1 [file s1]

Table S1 Average values of leaf traits and photosynthetic characteristics for different hybrid clones of different ploidies

| Clone/Ploidy | LL           | LW           | LA           | LSI       | Pn         | Gs        | Ci           | Tr        | WUE       |
|--------------|--------------|--------------|--------------|-----------|------------|-----------|--------------|-----------|-----------|
| BCXH         | 125.87±7.31  | 139.11±4.19  | 123.4±5.08   | 0.91±0.06 | 18.91±0.79 | 0.49±0.07 | 296.44±12.86 | 5.29±0.43 | 3.60±0.39 |
| HB3.1        | 129.62±1.91  | 161.29±1.71  | 147.00±2.83  | 0.80±0.02 | 20.27±1.53 | 0.37±0.07 | 265.56±19.60 | 4.79±0.56 | 4.29±0.62 |
| HB4.1        | 117.67±1.52  | 145.71±2.30  | 124.90±2.30  | 0.81±0.01 | 19.06±1.15 | 0.30±0.05 | 253.67±12.23 | 3.81±0.48 | 5.04±0.39 |
| HY3.1        | 118.21±1.57  | 152.15±3.14  | 134.90±2.13  | 0.78±0.02 | 19.30±1.03 | 0.48±0.07 | 292.67±5.98  | 5.30±0.24 | 3.64±0.07 |
| HY3.3        | 135.71±1.83  | 179.04±2.13  | 169.60±3.21  | 0.76±0.01 | 19.09±0.83 | 0.31±0.05 | 255.78±18.25 | 4.06±0.45 | 4.76±0.54 |
| SX3.1        | 140.37±2.82  | 138.05±2.32  | 156.10±4.29  | 1.02±0.03 | 20.73±1.36 | 0.40±0.11 | 267.00±29.80 | 3.95±0.77 | 5.45±1.21 |
| SX3.2        | 130.86±3.91  | 155.99±4.01  | 160.04±2.90  | 0.84±0.01 | 19.34±1.18 | 0.55±0.07 | 301.89±3.18  | 5.34±0.40 | 3.62±0.11 |
| SX3.3        | 129.35±2.38  | 155.95±3.79  | 151.80±4.27  | 0.83±0.01 | 22.22±0.29 | 0.48±0.05 | 278.22±8.60  | 5.72±0.43 | 3.91±0.34 |
| SY3.1        | 148.44±3.10  | 160.74±2.05  | 171.60±6.19  | 0.92±0.02 | 19.81±1.84 | 0.46±0.08 | 288.11±11.81 | 3.93±0.44 | 5.08±0.56 |
| SY3.2        | 131.57±2.97  | 181.79±4.58  | 161.80±4.66  | 0.72±0.02 | 16.17±0.53 | 0.32±0.03 | 282.56±9.59  | 4.15±0.24 | 3.91±0.30 |
| XH           | 131.51±2.94  | 140.34±4.64  | 127.20±6.61  | 0.94±0.02 | 19.71±1.16 | 0.49±0.03 | 292.89±5.49  | 5.39±0.20 | 3.66±0.24 |
| XH14         | 123.97±3.29  | 137.54±3.33  | 120.40±4.62  | 0.90±0.03 | 18.51±2.22 | 0.35±0.11 | 270.78±15.12 | 3.53±0.74 | 5.34±0.64 |
| XY3.1        | 108.87±3.07  | 121.41±4.27  | 91.40±5.41   | 0.90±0.05 | 18.51±2.22 | 0.35±0.11 | 270.78±15.12 | 3.53±0.74 | 5.34±0.64 |
| XY3.4        | 128.23±2.75  | 138.54±3.76  | 108.60±3.91  | 0.93±0.02 | 20.77±1.27 | 0.43±0.02 | 279.11±8.92  | 4.46±0.09 | 4.66±0.34 |
| XY3.5        | 121.43±3.04  | 129.70±3.76  | 97.20±3.96   | 0.94±0.02 | 18.93±2.15 | 0.40±0.10 | 280.44±13.21 | 4.02±0.72 | 4.78±0.57 |
| XY3.6        | 120.74±3.61  | 138.80±2.24  | 123.63±5.40  | 0.87±0.03 | 18.79±0.43 | 0.38±0.03 | 280.78±8.01  | 4.60±0.21 | 4.09±0.27 |
| XY3.7        | 117.19±3.55  | 128.89±2.45  | 104.40±6.07  | 0.91±0.02 | 18.12±0.94 | 0.29±0.06 | 255.67±17.71 | 3.43±0.54 | 5.37±0.64 |
| XY4.1        | 111.05±3.19  | 142.18±3.34  | 122.35±4.70  | 0.78±0.04 | 18.74±0.35 | 0.41±0.06 | 284.00±13.83 | 4.86±0.46 | 3.90±0.44 |
| XY4.2        | 142.45±4.48  | 161.06±6.82  | 155.20±4.76  | 0.89±0.02 | 18.59±0.33 | 0.40±0.03 | 284.89±5.30  | 5.06±0.18 | 3.68±0.13 |
| Control      | 127.11±5.64  | 139.00±3.97  | 123.67±5.85  | 0.91±0.04 | 19.04±1.55 | 0.44±0.1  | 286.70±16.26 | 4.74±1.00 | 4.20±0.93 |
| Triploid     | 127.74±10.52 | 149.41±18.44 | 136.77±27.96 | 0.86±0.08 | 19.39±1.91 | 0.40±0.1  | 276.81±19.16 | 4.41±0.83 | 4.53±0.83 |
| Tetraploid   | 123.72±14.32 | 149.65±9.49  | 134.15±15.90 | 0.82±0.05 | 18.80±0.72 | 0.37±0.07 | 274.19±18.23 | 4.57±0.67 | 4.21±0.70 |

Note: (Pn): net photosynthesis rate; (Ci): intercellular CO<sub>2</sub> concentration; (Gs): stomatal conductance; (Tr): transpiration rate; (WUE): water use efficiency; (LL): leaf length; (LW): leaf weight; (LA): leaf area; (LSI): leaf shape index.

Table S2 Average values of growth traits for different hybrid clones of different ploidies

| Clone/Ploidy | H1        | BD1        | H2        | BD2         | H3        | BD3         | DBH3        | V3          | H4        | BD4          | DBH4        | V4          |
|--------------|-----------|------------|-----------|-------------|-----------|-------------|-------------|-------------|-----------|--------------|-------------|-------------|
| BCXH         | 2.17±0.31 | 17.63±2.95 | 3.93±0.45 | 46.66±8.05  | 5.57±0.90 | 83.02±21.56 | 49.48±13.08 | 0.006±0.004 | 7.34±1.01 | 105.00±21.58 | 71.22±17.07 | 0.016±0.010 |
| HB3.1        | 1.80±0.19 | 16.45±2.28 | 2.95±0.14 | 30.88±3.97  | 4.74±0.34 | 54.25±7.25  | 33.6±4.47   | 0.002±0.001 | 7.31±0.45 | 67.22±9.48   | 44.44±4.85  | 0.006±0.002 |
| HB4.1        | 1.89±0.19 | 15.34±1.92 | 3.25±0.34 | 37.37±3.98  | 4.90±0.27 | 57.68±7.11  | 36.74±6.15  | 0.003±0.001 | 6.18±0.27 | 73.22±9.48   | 50.33±6.14  | 0.006±0.002 |
| HY3.1        | 2.07±0.17 | 16.05±1.73 | 4.00±0.26 | 42.72±4.99  | 5.70±0.38 | 77.01±8.31  | 48.21±3.70  | 0.005±0.001 | 6.69±0.33 | 98.78±9.01   | 61.22±4.71  | 0.010±0.002 |
| HY3.3        | 2.07±0.15 | 19.01±1.48 | 3.98±0.32 | 54.06±8.76  | 5.60±0.44 | 77.61±1.61  | 49.36±4.78  | 0.005±0.001 | 7.88±0.72 | 97.33±3.24   | 65.67±5.27  | 0.013±0.003 |
| SX3.1        | 2.25±0.15 | 19.75±2.31 | 4.63±0.31 | 55.53±4.45  | 6.88±0.26 | 94.54±14.59 | 64.87±7.51  | 0.011±0.003 | 9.00±0.35 | 134.11±14.04 | 94.22±8.30  | 0.030±0.006 |
| SX3.2        | 2.09±0.21 | 17.94±2.09 | 4.07±0.26 | 48.11±5.25  | 5.54±0.69 | 74.06±9.47  | 45.67±9.01  | 0.005±0.002 | 6.96±0.77 | 91.00±12.30  | 63.67±9.51  | 0.011±0.004 |
| SX3.3        | 2.07±0.13 | 18.28±1.63 | 4.22±0.26 | 50.92±2.66  | 6.20±0.63 | 82.96±11.57 | 55.16±7.96  | 0.008±0.003 | 7.77±0.87 | 101.56±12.52 | 71.33±12.85 | 0.016±0.007 |
| SY3.1        | 2.16±0.24 | 20.27±3.27 | 4.47±0.40 | 55.18±10.39 | 6.04±0.54 | 80.94±17.02 | 51.34±12.44 | 0.007±0.003 | 7.90±0.83 | 109.67±15.39 | 77.67±14.32 | 0.019±0.009 |
| SY3.2        | 2.46±0.21 | 19.61±2.26 | 4.37±0.27 | 51.10±3.99  | 5.70±0.32 | 81.78±6.33  | 49.2±7.28   | 0.005±0.002 | 6.96±0.29 | 101.89±5.25  | 66.22±9.42  | 0.012±0.004 |
| XH           | 2.06±0.15 | 16.34±1.77 | 4.27±0.17 | 49.35±3.70  | 6.03±0.5  | 79.27±12.81 | 53.04±9.95  | 0.007±0.003 | 7.76±0.78 | 101.89±17.11 | 69.00±12.02 | 0.015±0.006 |
| XH14         | 2.06±0.08 | 17.00±1.26 | 4.01±0.45 | 43.95±6.86  | 6.10±0.79 | 80.92±14.48 | 52.59±9.91  | 0.007±0.003 | 7.94±0.49 | 107.11±13.31 | 69.44±10.03 | 0.015±0.005 |
| XY3.1        | 1.96±0.10 | 15.12±0.62 | 4.25±0.40 | 42.78±4.86  | 6.34±0.61 | 70.46±9.61  | 51.06±7.56  | 0.007±0.002 | 8.54±0.50 | 93.67±17.49  | 74.11±14.00 | 0.019±0.007 |
| XY3.4        | 1.75±0.08 | 14.15±1.37 | 3.29±0.28 | 33.52±2.47  | 5.58±0.08 | 59.39±1.91  | 36.43±2.26  | 0.003±0.000 | 6.98±0.43 | 78.00±8.19   | 57.89±6.53  | 0.009±0.003 |
| XY3.5        | 1.75±0.15 | 14.22±1.53 | 3.35±0.30 | 37.09±4.26  | 5.00±0.59 | 62.88±7.83  | 39.37±4.86  | 0.003±0.001 | 6.47±0.57 | 76.67±6.00   | 52.33±3.87  | 0.007±0.001 |
| XY3.6        | 1.68±0.12 | 14.48±1.21 | 3.86±0.65 | 44.09±6.14  | 5.71±0.38 | 72.45±7.63  | 43.15±4.12  | 0.004±0.001 | 7.17±0.55 | 92.22±8.00   | 64.22±8.03  | 0.012±0.004 |
| XY3.7        | 1.69±0.06 | 14.88±0.93 | 3.28±0.26 | 42.93±3.56  | 5.36±0.52 | 69.2±13.81  | 42.59±4.99  | 0.004±0.001 | 7.18±0.40 | 93.67±13.61  | 71.56±11.16 | 0.014±0.005 |
| XY4.1        | 1.74±0.18 | 15.82±1.62 | 2.73±0.25 | 30.64±3.86  | 4.14±0.78 | 49.17±16.04 | 29.45±11.25 | 0.002±0.001 | 5.78±0.83 | 79.00±12.25  | 52.11±9.74  | 0.007±0.003 |
| XY4.2        | 1.88±0.15 | 15.93±2.05 | 3.87±0.21 | 47.33±2.97  | 6.02±0.32 | 85.02±13.94 | 55.13±5.49  | 0.007±0.002 | 8.26±0.44 | 114.67±5.85  | 78.56±5.03  | 0.019±0.003 |
| Control      | 2.09±0.21 | 16.99±2.12 | 4.07±0.40 | 46.65±6.67  | 5.90±0.76 | 81.07±16.14 | 51.70±10.77 | 0.007±0.003 | 7.68±0.80 | 104.67±17.11 | 69.89±12.89 | 0.015±0.007 |
| Triploid     | 1.98±0.28 | 16.94±2.84 | 3.89±0.61 | 45.17±9.54  | 5.71±0.71 | 73.22±14.36 | 46.67±10.36 | 0.005±0.003 | 7.42±0.91 | 94.44±19.56  | 66.14±14.92 | 0.014±0.008 |
| Tetraploid   | 1.82±0.19 | 15.66±1.81 | 3.30±0.54 | 38.85±7.52  | 5.05±0.95 | 65.26±20.11 | 41.12±13.61 | 0.004±0.003 | 6.81±1.25 | 91.44±19.52  | 61.56±14.69 | 0.011±0.007 |

Note: (H1): 1-year-old tree height; (H2): 2-year-old tree height; (H3): 3-year-old tree height; (H4): 4-year-old tree height; (BD1): 1-year-old ground diameter; (BD 2): 2-year-old ground diameter; (BD 3): 3-year-old ground diameter; (BD 4): 4-year-old ground diameter; (DBH3): 3-year-old diameter at breast height; (DBH4): 4-year-old diameter at breast height; (V3): 3-year-old volume; (V4): 4-year-old volume.

**Table S3.** Principal component analysis of three broad categories

| Principal component factor  | Component I | Component II | Component III |
|-----------------------------|-------------|--------------|---------------|
| Eigenvalue                  | 9.787       | 3.836        | 3.448         |
| Contribution (%)            | 46.61       | 18.27        | 16.42         |
| Cumulative contribution (%) | 46.61       | 64.88        | 81.30         |
| LL                          | 0.468       | 0.632        | 0.071         |
| LW                          | -0.057      | 0.965        | 0.094         |
| LA                          | 0.265       | 0.920        | 0.139         |
| LSI                         | 0.524       | -0.575       | -0.086        |
| Pn                          | 0.053       | 0.014        | 0.184         |
| Gs                          | 0.165       | -0.012       | 0.889         |
| Ci                          | 0.150       | -0.035       | 0.919         |
| Tr                          | -0.101      | 0.183        | 0.899         |
| WUE                         | 0.197       | -0.240       | -0.882        |
| H1                          | 0.613       | 0.547        | 0.170         |
| BD1                         | 0.526       | 0.754        | 0.027         |
| H2                          | 0.897       | 0.241        | 0.152         |
| BD2                         | 0.833       | 0.434        | 0.047         |
| H3                          | 0.936       | -0.007       | -0.016        |
| BD3                         | 0.926       | 0.245        | 0.147         |
| DBH3                        | 0.963       | 0.151        | 0.052         |
| V3                          | 0.966       | 0.103        | 0.026         |
| H4                          | 0.834       | 0.055        | -0.221        |
| BD4                         | 0.940       | 0.157        | 0.058         |
| DBH4                        | 0.956       | 0.003        | -0.063        |
| V4                          | 0.938       | 0.003        | -0.134        |

Note: (Pn): net photosynthesis rate; (Ci): intercellular CO<sub>2</sub> concentration; (Gs): stomatal conductance; (Tr): transpiration rate; (WUE): water use efficiency; (LL): leaf length; (LW): leaf weight; (LA): leaf area; (LSI): leaf shape index; (H1): 1-year-old tree height; (H2): 2-year-old tree height; (H3): 3-year-old tree height; (H4): 4-year-old tree height; (BD1): 1-year-old ground diameter; (BD 2): 2-year-old ground diameter; (BD 3): 3-year-old ground diameter; (BD 4): 4-year-old ground diameter; (DBH3): 3-year-old diameter at breast height; (DBH4): 4-year-old diameter at breast height; (V3): 3-year-old volume; (V4): 4-year-old volume.
